# Supplementary material for: Excessive Gestational Weight Gain Alters the DNA Methylation and Influences Foetal and Neonatal Body Composition
Source: Preprints.org preprint supplement (doi:10.20944/preprints202306.1994.v1), 2023-06-28

**Figure S1 (additional file**[**1**](https://clinicalepigeneticsjournal.biomedcentral.com/articles/10.1186/s13148-023-01431-x#MOESM1)**).** Density plot of beta-values. Left panel: Raw data. Right panel: BMIQ-normalized data.


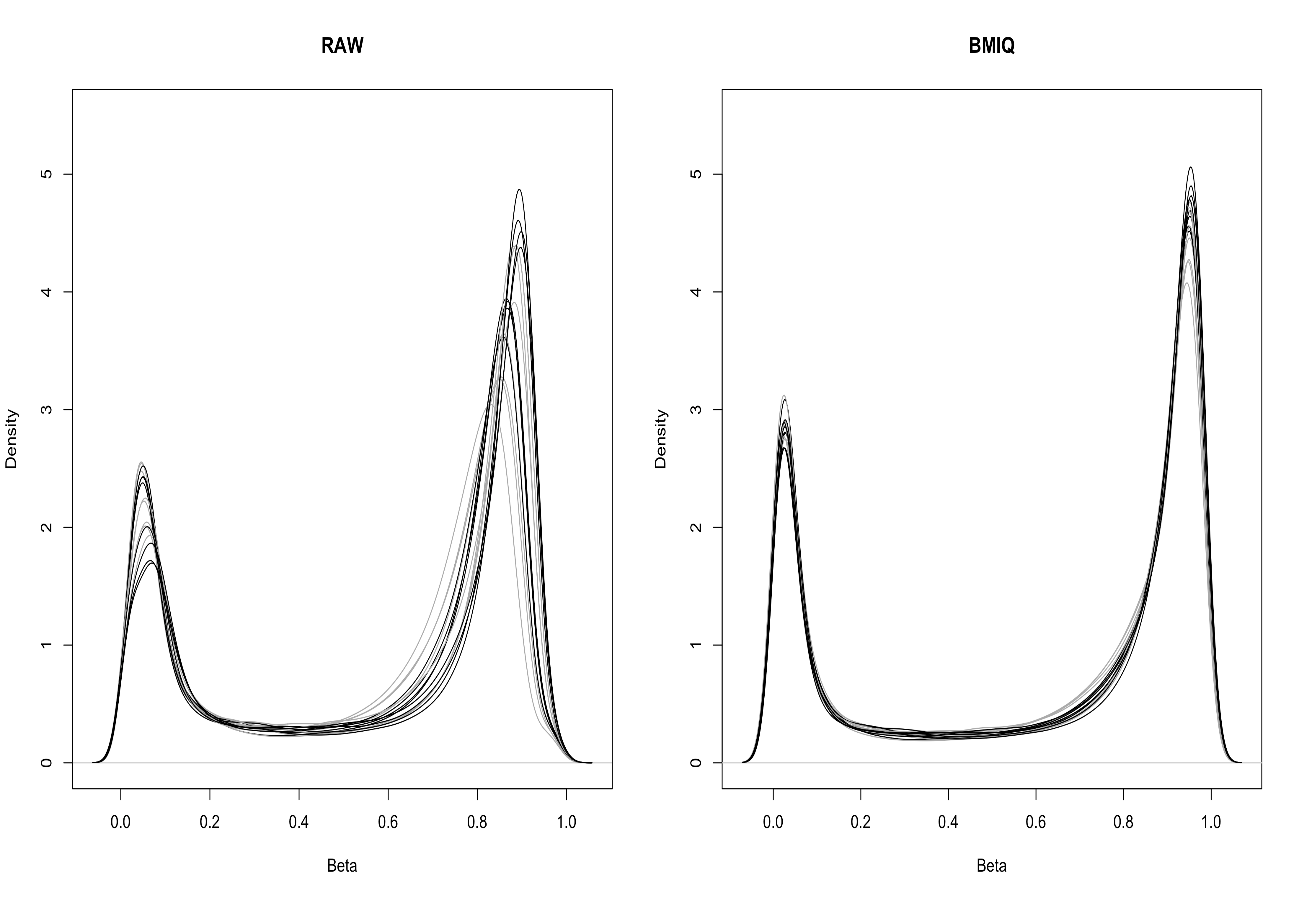

Supplement: Supplementary file 1 [file supplementary]
